# Supplementary material
Source: publisher site journal article supplement (https://www.dovepress.com/article/540753)
Supplement: Supplementary file 1 [file 540753%20Revised%20Supplementary%20material.docx]

# Supplemental information

# Appendix A (METHODS)

*Table A.1: Search strategies for the databases PubMed, CINAHL, EMBASE, Web of Science and Cochrane Library*

| Database | Search strategy |
| --- | --- |
| PubMed | "Pulmonary Disease, Chronic Obstructive"[Majr] AND ("Forecasting"[Mesh] OR "Prognosis"[Mesh] OR "predict*"[tiab]) AND ("exacerbat*"[tiab] OR "Symptom Flare Up"[Mesh] OR "Hospitalization"[Mesh] OR "Pneumonia"[Mesh]) AND (("Epidemiologic Factors"[Majr] OR "Population Characteristics"[Majr]) OR ("Biomarkers"[Majr] OR "Inflammation"[Majr] OR "Inflammation Mediators"[Majr]) OR ("Respiratory Function Tests"[Majr] OR "Respiratory Rate"[Majr]) OR ("Activities of Daily Living"[Majr] OR "Signs and Symptoms"[Majr]))  Limits:   - 2011-2023 |
| CINAHL | (MM "Pulmonary Disease, Chronic Obstructive+") AND ((MH "Forecasting") OR (MH "Prognosis+") OR "predict*")) AND ("exacerbat*" OR ("MH Disease exacerbation") OR (MH "Hospitalization+") OR (MH "Pneumonia+")) AND ((MM "Population Characteristics+") OR (MM "Biological markers+") OR (MM "Inflammation+") OR (MM "Respiratory Function Tests+") OR (MM "Respiratory Rate") OR (MM "Activities of Daily Living+") OR (MM "Signs and Symptoms+"))  Limits:   - 2011-2023 - Academic Journals - English |
| EMBASE | 'chronic obstructive lung disease'/exp/mj AND ('prediction and forecasting'/exp OR 'prognosis'/exp OR predict*ti,ab) AND (exacerbat*ti,ab OR 'disease exacerbation'/exp OR 'hospitalization'/exp OR 'pneumonia'/exp) AND (('epidemiology'/exp/mj OR 'population and population related phenomena'/exp/mj) OR ('biological marker'/exp/mj OR 'inflammation'/exp/mj) OR ('lung function test'/exp/mj OR 'breathing rate'/exp/mj) OR ('daily life activity'/exp/mj OR 'physical disease by body function'/exp/mj)) AND (2011:py OR 2012:py OR 2013:py OR 2014:py OR 2015:py OR 2016:py OR 2017:py OR 2018:py OR 2019:py OR 2020:py OR 2021:py OR 2022:py OR 2023) AND [embase]/lim NOT ([embase]/lim AND [medline]/lim) AND ('article'/it OR 'review'/it)  Limits:   - Publication year - Only EMBASE database - Only articles and reviews |
| Web of Science | (TS=(COPD) OR TS=(Chronic obstructive pulmonary disease)) AND (TS=(Forecast*) OR TS=(prognos*) OR TS=(predict*)) AND (TS=(exacerb*) OR TS=(symptom flare up) OR TS=(hospitali?ation) OR TS=(Pneumonia)) AND (TS=(epidemiolog*) OR TS=(causal*) OR TS=(risk factor*) OR TS=(sex) OR TS=(demograph*) OR TS=(population) OR TS=(ethnic*) OR TS=(characterist*) OR TS=(biomarker*) OR TS=(marker*) OR TS=(inflammat*) OR TS=(respirat* function test*) OR TS=(airway resistance) OR TS=(blood gas analysis) OR TS=(bronchial provocation test*) OR TS=(capnography) OR TS=(lung compliance) OR TS=(lung volume) OR TS=(respirat* pressure*) OR TS=(plethysmography) OR TS=(pulmonary gas exchange) OR TS=(ventilation) OR TS=(spirometry) OR TS=(valsalva* maneuver) OR TS=(work of breathing) OR TS=(respirat* rate) OR TS=(activit* of daily living) OR TS=(ADL) OR TS=(limit*) OR TS=(symptom*) OR TS=(weight) OR TS=(fatigue))  Limits:   - NOT Database: MEDLINE® - Document Types: Articles or Review Articles - Languages: English |
| Cochrane Library | [mh "Pulmonary Disease, Chronic Obstructive"] AND ([mh "Forecasting"] OR [mh "Prognosis"] OR "predict*":ti,ab) AND ("exacerbat*":ti,ab OR [mh "Symptom Flare Up"] OR [mh "Hospitalization"] OR [mh "Pneumonia"]) AND (([mh "Epidemiologic Factors"[mj]] OR [mh "Population Characteristics"[mj]]) OR ([mh "Biomarkers"[mj]] OR [mh "Inflammation"[mj]]) OR ([mh "Respiratory Function Tests"[mj]] OR [mh "Respiratory Rate"[mj]]) OR ([mh "Activities of Daily Living"[mj]] OR [mh "Signs and Symptoms"[mj]])) |

# Appendix B (RESULTS)

## B: complete overview of identified possible predictors of AECOPD

Table B1: Total overview of the identified possible predictors of AECOPD, studies that reported a statistically significant (p<0.05) – in bold -association to the outcome measures of interest are in bold text

| **Predictor, (predictor field)** | **Reference** | **Predictor information** | **Moderate AECOPD**  **HR/OR/RR/ IRR/ LL/ Coef (95%CI)** | **Severe AECOPD**  **HR/OR/RR/ IRR/ LL/ Coef (95%CI)** | **Both moderate and severe AECOPD**  **HR/OR/RR/ IRR/ LL/ Coef (95%CI)** | **AUC/ C-statistic [SN,SP, PPV,NPV; as %] (95% CI)** |
| --- | --- | --- | --- | --- | --- | --- |
| FEV1,  (Lung function test result) | Abe, 2021 | ≥ 100 mL decline in  forced expiratory volume in 1 s [FEV1])  4-year risk of exacerbations | HR: 0.79 (0.48 – 1.26) | HR: 0.62 (0.24-1.40) |  |  |
| Decrease ≥ 200mL from baseline in post-bronchodilator FEV  4-year risk of exacerbations | HR: 0,60 (0.23-1.28) | HR: 1.03 (0.24-2.96) |  |  |
| SGRQ,  (Symptom) | Health status (≥ 4-unit increase in St George’s Respiratory Questionnaire [SGRQ])  4-year risk of exacerbations | HR: 0.93 (0.56-1.50) | HR: 1.65 (0.76-3.49) |  |  |
| Increase ≥ 8 units in SGRQ score from baseline  4-year risk of exacerbations | HR: 1.10 (0.60-1.89) | **HR: 2.59 (1.15-5.53)** |  |  |
| Exacerbation incidence,  (Patient characteristic) | Incidence of moderate or severe exacerbation  4-year risk of exacerbations | **HR: 2.25 (1.28-3.82)** | HR: 0.81(0.23-2.18) |  |  |
| CID, (Composite; lung function test, symptoms, patient characteristic | Clinically important deterioration (CID) composite;  Definition 1, any of the following:  1) decrease ≥ 100 mL from baseline in post-bronchodilator FEV1;  (2) increase ≥ 4 units in SGRQ score from baseline;  (3) incidence of moderate or severe exacerbation.   - - 4-year risk of exacerbations | HR: 1.35 (0.85-2.20 | HR: 1.07 (0.50-2.44) |  |  |
| composite;  Definition 2, any of the following:  (1) decrease ≥ 200 mL from baseline in post-bronchodilator FEV1;  (2) increase ≥ 8 units in SGRQ score from baseline;  (3) incidence of moderate or severe exacerbation.   - - 4-year risk of exacerbations | HR: 1.53 (0.97-2.44) | HR: 1.79 (0.84-3.89) |  |  |
| Sarcopenia index,  (Biomarker) | Amado, 2019 | Sarcopenia index = ratio serum creatinine/serum cystatin C   1. Lowest SI quartile: < 73.9,   Risk for in the following year | OR: 1.62 (0.54-4.89) | **OR: 5.16 (1.23-21.7)** |  |  |
| Age,  (Patient characteristic) | Years  Risk for in the following year | OR: 0.98 (0.92-1.04) | OR: 0.97 (0.86-1.10) |  |  |
| Sex,  (Patient characteristic) | Risk for in the following year | OR: 0.49 (0.53-3.82) | OR: 0.97 (0.91-14.40) |  |  |
| CAT, (Composite; patient characteristic, symptom) | COPD assessment test (CAT)  Risk for in the following year | OR: 1.02 (0.96-1.08) | OR: 0.97 (0.88-1.07) |  |  |
| Exacerbation incidence, (Patient characteristic) | History of ≥2 moderate COPD exacerbations OR ≥ 1 severe COPD exacerbation in previous year  Risk for in the following year | OR: 1.6 (0.66-3.87) | OR: 2.3 (0.55-10.01) |  |  |
| Charlson index,  (Symptom) | Risk for in the following year | OR: 1.2 (0.73-1.96) | OR: 1.05 (0.54-2.02) |  |  |
| mMRC,  (Symptom) | modified Medical Research Council (mMRC)  Risk for in the following year | OR: 1.39 (0.79-2.44) | **OR:** **2.75 (1.05-7.21)** |  |  |
| FEV1%,  (Lung function test result) | Risk for in the following year | OR: 0.98 (0.95-1.0) | OR: 1.05 (0.54-2.02) |  |  |
| Age,  (Patient characteristic) | Andrianopoulos, 2015 | In years   - cut-off value: ≥ 65 years   3-year hospitalization |  | **HR: 1.30 (1.11- 1.52)** |  | AUROC 0.54 [SN 0.53, SP 0.55] |
| BMI,  (Patient characteristic) | In Kg/m2   - cut-off value: ≥23   3-year hospitalization |  |  |  | AUROC 0.54 [SN 0.32, SP 0.75] |
| FEV1% predicted, (Lung function test result) | Cut off value: ≥44  3-year hospitalization |  | **HR: 2.40 (2.05-1.82)** |  | AUROC 0.67  [SN 0.60, SP 0.65] |
| FEV1/FVC, (Lung function test result) | Percentage (%)   - cut-off value: ≥45   3-year hospitalization |  |  |  | AUROC 0.63 [SN 0.67, SP 0.52] |
| SGRQ,  (Symptom) | St. George’s respiratory questionnaire (SGRQ)  Cut-off value: ≥45  3-year hospitalization |  | **HR: 2.38 (1.99-2.85)** |  | AUROC 0.66 [SN 0.73, SP 0.50] |
| 6MWD, (Lung function test result) | Six-minute walk distance (6MWD),   - cut-off value ≤ 357 m   3-year hospitalization |  | HR: 1.12 (0.94-1.35) |  | AUROC 0.60 [SN 0.54, SP 0.62] |
| 6MWSpeed, (Lung function test result) | Six-minute walk speed (6MWSpeed) = 6-Minute Walk Distance / walking time   - cut-off value ≤ 1.0 m/sec   3-year hospitalization |  | HR: 1.11 (0.94-1.34) |  | AUROC 0.60 [SN 0.56, SP 0.58) |
| 6MWW,  (Lung function test result) | Six-minute walk-work (6MWW) = 6-Minute Walk Distance * body weight   - cut-off value ≤ 27000 m.kg   3-year hospitalization |  | **HR: 1.23 (1.01-1.50)** |  | AUROC 0.62 [SN 0.61, SP 0.56] |
| DSP,  (Lung function test result) | Distance-saturation product  (DSP)= 6-Minute Walk Distance * oxygen saturation % (Spo2%)   - cut-off value ≤ 310 m%   3-year hospitalization |  | HR: 1.18 (0.98-1.42) |  | AUROC 0.62 [SN 0.52, SP 0.67] |
| BODE index,  (Composite; patient characteristic, symptom, lung function test result) | Calculated using the algorithm developed by Celli and colleagues   - Cut-off value ≤3 points   3-year hospitalization |  | **HR:** **1.40 (1.08-1.82)** |  | AUROC 0.69 [SN 0.57, SP 0.69] |
| EID, (Lung function test result) | Exercise-induced oxygen desaturation (EID)= the postexercise oxygen saturation (SpO2) ≤ 88%. In the 6-minute walking test.   - ≤ Cut-off value 88   3-year hospitalization |  | **HR: 1.25 (1.04-1.51)** |  |  |
| Unintended stops in 6MWT, (Lung function test result) | Unintended stops in 6-minute walking test (6MWT): (temporary) discontinuation of the 6-minute walk test (6MWT).   - Cut-off value: completers(reference); stoppers   3-year hospitalization |  | **HR:** **1.04 (0.73-1.50)** |  |  |
| GOLD 2007 I-IV,  (Lung function test result) | Brusse-Keizer, 2017 | COPD GOLD classification into I, II, III or IV by spirometry only  A) GOLD I: reference;  B) GOLD II: reference;  C) GOLD III: reference | **A) GOLD II: HR: 2.0**  **(1.1-3.8);**  **GOLD III: HR: 4.1 (2.2-7.5);**  **GOLD IV: HR: 6.4**  **(3.2-12.8);**  **B) GOLD III: HR: 2.0**  **(1.5-2.6);**  **GOLD IV: HR: 3.1**  **(2.1-4.7);**  **C) GOLD IV: HR: 1.6**  **(1.1-2.3)** |  |  | AUROC 0.69 |
| GOLD 2011 ABCD (mMRC), (Composite; symptom, lung function test result) | COPD GOLD classification into A, B, C or D via spirometry, history of exacerbations and mMRC  A) GOLD A: reference;  B) GOLD B: reference;  C) GOLD C: reference; | A) GOLD B: N.S.A. HR: NR;  **GOLD C: HR: 2.0 (1.3-3.2);**  **GOLD D: HR: 4.2 (2.8-6.1);**    B) GOLD C: N.S.A HR: NR;  **GOLD D: HR: 2.5 (1.7-3.8)**  C) **GOLD D: HR: 2.1**  **(1.5-2.8)** |  |  | AUROC 0.69 |
| GOLD 2011 ABCD (CCQ 1.0), (Composite; patient characteristic, symptom, lung function test result) | COPD GOLD classification into A, B, C or D via spirometry, history of exacerbations and CCQ with cut off score 1.0  A) GOLD A: reference;  B) GOLD B: reference;  C) GOLD C: reference; | A) **GOLD B: HR: 2.7 (1.4-5.1);**  GOLD C: N.S.A. HR: NR;  **GOLD D: HR: 6.8 (3.7-12.6)**  B) GOLD C: N.S.A. HR: NR;  **GOLD D: HR: 2.6 (1.9-3.5)**  C) **GOLD D: HR: 3.7 (2.3-6.2)** |  |  | AUROC 0.72 |
| GOLD 2011 ABCD (CCQ 1.5),  (Composite; patient characteristic, symptom, lung function test result) | COPD GOLD classification into ABC or D via spirometry, history of exacerbations and CCQ with cut off score 1.5  A) GOLD A: reference;  B) GOLD B: reference;  C) GOLD C: reference; | A**) GOLD B: HR: 2.9 (1.7-4.9);**  **GOLD C: HR: 2.5 (1.5-4.2)**  **GOLD D: HR: 6.3 (4.0-9.9);**  B) GOLD C: N.S.A. HR: NR  **GOLD D: HR: 2.1 (1.5-3.2);**  C) **GOLD D: HR: 2.5 (1.8-3.4)** |  |  | AUROC 0.71 |
| Continuous vitamin D,  (Biomarker) | Burkes, 2020 | Serum 25-OH-vitamin D:  per 10 ng/ml decrease  risk of AECOPD at 1 year | OR: 1.06 (0.61-1.18) | OR: 1.09 (0.93-1.27) |  |  |
| Vitamin D deficiency,  (Biomarker) | Serum 25-OH-vitamin D:  deficient < 20 ng/mL versus not deficient ≥ 20 ng/mL  risk of AECOPD at 1 year | OR: 1.14 (0.83-1.50) | OR: 0.87 (0.56-1.36) |  |  |
| Age,  (Patient characteristic) | Busch, 2016 | In years  (Subpopulation: tiotropium/ICS/LABA) |  |  | OR: 0.98 (0.95-1.00) |  |
| Age,  (Patient characteristic) | In years  (Subpopulation: tiotropium) |  |  | **OR: 0.93 (0.87-1.00)** |  |
| Age,  (Patient characteristic) | In years  (Subpopulation: ICS/LABA) |  |  | OR: 1.00 (0.96-1.03) |  |
| Age,  (Patient characteristic) | In years  (Subpopulation: SABD) |  |  | OR: 1.01 (0.97-1.05) |  |
| Sex,  (Patient characteristic) | Female sex  (Subpopulation: SABD) |  |  | **OR: 2.56 (1.30-5.03)** |  |
| Sex,  (Patient characteristic) | Female  (Subpopulation: tiotropium/ICS/LABA) |  |  | **OR: 1.53 (1.05-2.21)** |  |
| Sex,  (Patient characteristic) | Female sex  (Subpopulation: ICS/LABA) |  |  | **OR: 1.90 (1.19-3.05)** |  |
| Sex,  (Patient characteristic) | Female sex  (Subpopulation: SABD) |  |  | **OR: 2.56 (1.30-5.03)** |  |
| Race,  (Patient characteristic) | African-American race  Race (subpopulation: tiotropium) |  |  | OR: 0.15 (0.02-1.28) |  |
| Race, (patient characteristic) | African-American race  (Subpopulation: tiotropium/ICS/LABA) |  |  | OR: 0.69 (0.44-1.09) |  |
| Race,  (Patient characteristic) | African-American race  (Subpopulation: ICS/LABA) |  |  | OR: 0.71 (0.39-1.29) |  |
| Race,  (Patient characteristic) | African-American race  (Subpopulation: SABD) |  |  | OR: 0.53 (0.23-1.21) |  |
| FEV1% predicted, (Lung function test result) | (Subpopulation: tiotropium/ICS/LABA) |  |  | OR: 1.00 (0.98-1.02) |  |
| FEV1% predicted,  (Lung function test result) | (Subpopulation: tiotropium) |  |  | OR: 1.02 (0.99-1.06) |  |
| FEV1% predicted  (Lung function test result) | (Subpopulation: ICS/LABA) |  |  | OR: 0.98 (0.96-1.01) |  |
| FEV1% predicted,  (Lung function test result) | (Subpopulation: SABD) |  |  | OR: 0.98 (0.96-1.01) |  |
| TLC,  (Lung function test result) | Total lung capacity (TLC) measured by computed tomography (CT)  (Subpopulation: tiotropium) |  |  | OR: 1.00 (0.97-1.04) |  |
| TLC,  (Lung function test result) | Total lung capacity measured (TLC) by computed tomography (CT)  (Subpopulation: tiotropium/ICS/LABA) |  |  | OR: 1.01 (0.99-1.02) |  |
| TLC,  (Lung function test result) | Total lung capacity (TLC) measured by computed tomography (CT)  (Subpopulation: ICS/LABA) |  |  | OR: 1.01 (0.99-1.02) |  |
| TLC,  (Lung function test result) | Total lung capacity (TLC) measured by computed tomography (CT)  (Subpopulation: SABD) |  |  | OR: 1.00 (0.98-1.03) |  |
| SGRQ,  (Symptom) | St. George’s respiratory questionnaire  -Total score  (Subpopulation: tiotropium/ICS/LABA) |  |  | **OR: 1.02 (1.00-1.03)** |  |
| SGRQ,  (Symptom) | St. George’s respiratory questionnaire  Total score  (Subpopulation: tiotropium) |  |  | OR: 1.01 (0.98-1.04) |  |
| SGRQ,  (Symptom) | St. George’s respiratory questionnaire Total score  (Subpopulation: ICS/LABA) |  |  | **OR: 1.03 (1.01-1.04)** |  |
| mMRC,  (Symptom) | modified Medical Research Council  (Subpopulation: tiotropium/ICS/LABA) |  |  | OR: 0.85 (0.60-1.21) |  |
| mMRC,  (Symptom) | modified Medical Research Council  (Subpopulation: ICS/LABA) |  |  | OR: 1.04 (0.71-1.54) |  |
| BODE,  (Composite; patient characteristic, symptom) | (Subpopulation: tiotropium/ICS/LABA) |  |  | OR: 1.08 (0.80-1.47) |  |
| BODE,  (Composite; patient, characteristic, symptom, lung function test result) | (Subpopulation: ICS/LABA) |  |  | OR: 0.96 (0.68-1.35) |  |
| BODE,  (Composite; patient, characteristic, symptom, lung function test result) | (Subpopulation: SABD) |  |  | OR: 1.00 (0.78-1.28) |  |
| Cough,  (Symptom) | Frequent cough  (Subpopulation: tiotropium/ICS/LABA) |  |  | OR: 1.11 (0.75-1.64) |  |
| Cough,  Symptom | Frequent cough  (Subpopulation: tiotropium) |  |  | OR: 1.69 (0.64-4.47) |  |
| Cough,  (Symptom) | Frequent cough  (Subpopulation: ICS/LABA) |  |  | OR: 1.50 (0.91-2.45) |  |
| Cough,  (Symptom) | Frequent cough  (Subpopulation: SABD) |  |  | **OR (95% CI): 2.14 (1.13-4.06)** |  |
| History of pneumonia,  (Patient characteristic) | (Subpopulation: tiotropium/ICS/LABA) |  |  | OR: 1.36 (1.03-1.80) |  |
| History of pneumonia,  (Patient characteristic) | (Subpopulation: ICS/LABA) |  |  | OR: 1.35 (0.99-1.84) |  |
| History of pneumonia,  (Patient characteristic) | (Subpopulation: SABD) |  |  | OR: 1.08 (0.75-1.56) |  |
| FEV1-BDR,  (Lung function test result) | (Subpopulation: tiotropium) |  |  | OR: 2.99 (0.10-87.43) |  |
| FEV1-BDR,  (Lung function test result) | (Subpopulation: ICS/LABA) |  |  | OR: 1.65 (0.42-6.39) |  |
| FEV1-BDR,  (Lung function test result) | (Subpopulation: SABD) |  |  | OR: 5.60 (0.97-32.41) |  |
| Gas trapping%,  (Lung function test result) | (Subpopulation: tiotropium) |  |  | **OR: 1.06 (1.02-1.11)** |  |
| BDR,  (Lung function test result) | Positive bronchodilator respsonse (BDR) ATS-ERS definition  (Subpopulation: tiotropium) |  |  | N.S.A.: NR |  |
| SpO2,  (Lung function test result) | Oxygen saturation in rest  (Subpopulation: ICS/LABA) |  |  | OR: 0.97 (0.90-1.04) |  |
| 6MWD,  (Lung function test result) | Shorter 6-minute walking distance (6MWD)  (Subpopulation: ICS/LABA) |  |  | OR: 1.00 (1.00-1.00) |  |
| Emphysema %,  (Lung function test result) | (Subpopulation: ICS/LABA) |  |  | OR: 1.02 (0.99-1.04) |  |
| Emphysema %,  (Lung function test result) | (Subpopulation: SABD) |  |  | OR: 1.03 (0.99-1.08) |  |
| FVC % predicted,  (Lung function test result) | Lower FVC% predicted  (Subpopulation: ICS/LABA) |  |  | N.S.A.: NR |  |
| FEV1/FVC,  (Lung function test result) | Lower FEV1/FVC |  |  | N.S.A.: NR |  |
| Phlegm,  (Symptom) | Frequent phlegm  (Subpopulation: ICS/LABA) |  |  | N.S.A.: NR |  |
| Phlegm,  (Symptom) | Frequent phlegm  (Subpopulation: SABD) |  |  | N.S.A.: NR |  |
| IC,  (Lung function test result) | Celli, 2012 | Pre-bronchodilator inspiratory capacity was divided in quartiles, mean (range):  1) Q1, 1.15 (0.45–1.50)  2) Q2, 1.76 (1.51–2.00)  3) Q3, 2.25 (2.01–2.50)  4) Q4, 2.95 (2.51–4.00)  Lower quartiles are associated with higher exacerbation risk. |  |  | 1) Q1: HR: **0.81 (0.72-0.92)**  2) Q2: HR: **0.83 (0.73-0.94)**  3) Q3: HR: 0.95 (0.83-1.07)  4) Q4: HR: **0.86 (0.75-0.97)** |  |
| GOLD 2013 (ABCD),  (Composite; patient, characteristic, symptom, lung function test result) | Chen, 2015 | COPD GOLD 2013 classification into four groups (A–D) based on percentage of predicted postbronchodilator FEV1, mMRC scale, and risk of recurrent exacerbations as defined according to the GOLD 2013 guidelines.  1) Group A comprised participants with a low risk of exacerbation and few symptoms of dyspnea (mMRC 0–1).  2) Group B comprised participants with a low risk of exacerbation and many symptoms of dyspnea (mMRC ≥2).  3) Group C comprised participants with a high risk of exacerbation and few symptoms of dyspnea.  4) Group D comprised participants with a high risk of exacerbation and many symptoms of dyspnea.  A high risk of exacerbation was defined as a FEV1 of less than 50% of predicted, two or more moderate exacerbations, or one or more severe exacerbations in the preceding year, according to the GOLD 2013 guidelines. |  | 1) GOLD A: reference;  2) GOLD B: OR: 3.5 (0.9-13.5);  3) GOLD C: **OR: 20.9 (5.2-85.0);**  GOLD D: **OR: 31.8 (9.4-107.8)** | 1) GOLD A: reference;  2) GOLD B: OR: 1.7 (0.6-4.3);  3) GOLD C: **OR: 14.1 (4.6-43.2);**  GOLD D: **OR: 17.9 (7.6-42.0)** | Severe AECOPD and  both moderate and severe AECOPD: AUROC 0.79 |
| BODEx,  (Composite; patient, characteristic, symptom, | Participants were classified according to the BODEx index based on BMI, percentage of predicted postbronchodilator FEV1, mMRC scale, and frequency of severe exacerbations.  The scores for the BODEx Index ranged from 0 to 9 points, and participants were classified into four groups according to their score (Quartile 1 = 0–2 points, Quartile 2 = 3–4 points, Quartile 3 = 5–6 points, Quartile 4 = 7–9 points). |  | 1) Q1: reference  2) Q2: **OR: 6.4 (3.3-12.3)**  3) Q3: **OR: 8.1 (3.7-17.8)**  4) Q4**: OR: 36.8 (7.8-173.0)** | 1) Q1: reference  2) Q2: OR: **5.9 (3.1-11.3)**  3) Q3: **OR: 5.6 (2.6-12.0)**    4) Q4: **OR: 20.2 (4.4-93.3)** | Severe AECOPD: 0.73;  both moderate and severe AECOPD: 0.76 |
| MRC,  (Symptom | Cushen, 2016 | Changes in Modified Research Council (MRC) scores between day 1 post-discharge, day 14 and day 42.   - Change at day 14 | **AUROC 0.67 (0.5-0.8)** |  |  | [SN 0.77, SP 0.55] |
| Borg Score,  (Symptom) | Changes in Borg scores between day 1 post-discharge, day 14 and day 42. |  |  |  | AUROC 0.59 |
| CAT score,  (Symptom) | Changes in COPD assessment test(CAT) scores between day 1 post-discharge, day 14 and day 42. |  |  |  | AUROC 0.58 |
| FEV1 % predicted,  (Lung function test result) | Exuzides, 2017 | - per 1% increase   Likelihood (LL) of AECOPD within the coming year | **LL –1.06** | **LL –2.99** |  |  |
| Dyspnea symptoms,  (Symptom) | Presence of dyspnea was categorized as 0 or 1 according to patient answers to St George’s Respiratory Questionnaire for COPD (SGRQ-C) question 3: responses of ‘‘most days a week,’’ ‘‘several days a week,’’ and ‘‘none at all’’ were tracked separately.   - Most days vs none   Likelihood (LL) of AECOPD within the coming year | LL **+31.19** | LL +5.30 |  |  |
| Dyspnea symptoms,  (Symptom) | Presence of dyspnea was categorized as 0 or 1 according to patient answers to St George’s Respiratory Questionnaire for COPD (SGRQ-C) question 3: responses of ‘‘most days a week,’’ ‘‘several days a week,’’ and ‘‘none at all’’ were tracked separately.   - several days vs none   Likelihood (LL) of AECOPD within the coming year | **LL +29.05** | LL –0.63 |  |  |
| Cough and/or sputum,  (Symptom) | Cough and/or sputum were categorized as 0 (less than ‘‘most days per week’’) or 1 (‘‘most days per week’’), according to a patient response of ‘‘most days a week’’ to question 1 or 2 (SGRQ-C).  Likelihood (LL) of AECOPD within the coming year | **LL +13.34** | LL +1.29 |  |  |
| Age,  (Patient characteristic) | Per year  Likelihood (LL) of AECOPD within the coming year | LL +0.25 | **LL +2.22** |  |  |
| Smoking status,  (Patient characteristic) | Current vs former  Likelihood (LL) of AECOPD within the coming year | **LL –12.71** | LL +6.85 |  |  |
| Gender,  (Patient characteristic) | Female vs male  Likelihood (LL) of AECOPD within the coming year | **LL +30.53** | LL +7.92 |  |  |
| BMI,  (Patient characteristic) | Body mass index was defined as low (20 kg/m2), normal (21 to 30 kg/m2), or high (.30 kg/m2).   - High vs normal   Likelihood (LL) of AECOPD within the coming year | LL –4.17 | LL –8.95 |  |  |
| BMI,  (Patient characteristic) | Body mass index was defined as low (20 kg/m2), normal (21 to 30 kg/m2), or high (.30 kg/m2).   - Low vs normal   Likelihood (LL) of AECOPD within the coming year | **LL –14.47** | **LL +25.55** |  |  |
| 6mwd,  (Lung function test result) | 6-meter walking distance   - In meters   Likelihood (LL) of AECOPD within the coming year | **LL +0.040** | LL +0.03 |  |  |
| Fibrinogen,  (Biomarker) | In mg/dL  Likelihood (LL) of AECOPD within the coming year | **LL +0.080** | **LL +0.11** |  |  |
| mMRC,  (Symptom) | Baseline mMRC dyspnea score:  categorized as 1 if mMRC was ≥2 (moderate-to-severe dyspnea) and 0 if mMRC was <2 (none or mild dyspnea).   - ≥2 versus <2   Likelihood (LL) of AECOPD within the coming year | LL –0.53 | LL –0.60 |  |  |
| SGRQ total,  (Symptom) | derived from the SGRQ for COPD (SGRQ-C) questionnaire   - Per unit increase   Likelihood (LL) of AECOPD within the coming year | **LL +0.56** | **LL +2.19** |  |  |
| Prior exacerbations,  (Patient characteristic) | Prior chronic obstructive pulmonary disease exacerbations defined as 0 or ≥1, according to number of reported moderate or severe exacerbations during the 12-month period before baseline   - ≥1 vs 0   Likelihood (LL) of AECOPD within the coming year | **LL +125.81** | **LL +89.12** |  |  |
| Respiratory sounds PCA-SVM model,  (Lung function test result) | Fernandez – Granero, 2015 | PCA-SVM model of respiratory sounds measured by electret condenser omnidirectional microphone. Auscultation was performed on a daily basis by unsupervised patients at home. The sensor was placed on the suprasternal notch and the recording process was guided from the base-station by a multimodal interface. |  |  |  | [SN 0.74, SP 0.98, PPV 0.85, NPV 0.95] |
| PREO,  (Lung function test result) | Fortis, 2017 | PREO = Prebronchodilator FEV1/FVC < 0.7  Association of spirometric measures with number of moderate exacerbations and severe exacerbations per year from phase 1 (baseline) to phase 2 visit (5-year interval) | **Coef (95 % CI): 0.35 (0.31-0.4)** | **Coef (95 % CI) 0.14 (0.11-0.16)** |  |  |
| POSTO,  (Lung function test result) | POSTO = Postbronchodilator FEV1/FVC < 0.7  Association with number of moderate exacerbations and severe exacerbations per year from phase 1 (baseline) to phase 2 visit (5-year interval) | **Coef (95 % CI): 0.38 (0.34-0.43)** | **Coef (95 % CI) 0.14 (0.12-0.16)** |  |  |
| Prebronchodilator FEV1 % predicted,  (Lung function test result) | Pre bronchodilator FEV1% predicted (Pre-FEV1 %)  Association of spirometric measures with number of moderate exacerbations and severe exacerbations per year from phase 1 (baseline) to phase 2 visit (5-year interval) | **Coef (95 % CI): -0.011 (-0.012-0.01)** | **Coef (95 % CI): -0.004 (-0.0045-0.0036)** |  |  |
| Postbronchodilator FEV1 %redictedd,  (Lung function test result) | Post bronchodilator FEV1% predicted (post-FEV1 %)  Association of spirometric measures with number of moderate exacerbations and severe exacerbations per year from phase 1 (baseline) to phase 2 visit (5-year interval) | **Coef (95 % CI): -0.011 (-0.01-0.0097)** | **Coef (95 % CI): -0.004 (-0.0045-0.0036)** |  |  |
| BDR,  (Lung function test result) | Fortis, 2019 | (ATS) bronchodilator response (BDR): an increase in pre-bronchodilator FEV1 and/or FVC ≥12% and ≥200 ml after bronchodilator administration.  BDR categories:  1) No-BDR, no BDR by any criteria  2) FEV1-BDR, BDR in FEV1 but no BDR in FVC  3) FVC-BDR, BDR in FVC but no BDR in FEV1  4) Combined-BDR, BDR in both FEV1 and FVC.  All BDR categories had to meet both 12% and 200-ml volume criteria.  Association of BDR categories at enrolment with drop in FEV1 between baseline and 5-year follow-up visit and respiratory exacerbations in subjects with chronic obstructive pulmonary disease  *Models with ATS-BDR binary variable = BDR according to ATS guidelines; Yes or No as the independent variable. | 1) reference category  2) IRR: 1.18 (0.90-1.55)  3)IRR: 1.10 (0.93-1.30)  **4) IRR: 1.25 (1.03-1.50)**  *ATS-BDR: IRR: **1.16 (1.02-1.32)** | 1) reference category;  2): IRR: 0.97 (0.68-1.40)  3) IRR: 1.09 (0.88-1.35)  4) **IRR: 1.34 (1.05-1.71)**  *ATS-BDR: IRR: 1.16 (0.98-1.37) |  |  |
| BDR (relative change),  (Lung function test result | Association of bronchodilator response (BDR) categories at enrolment with drop in FEV1 between baseline and 5-year follow-up visit and respiratory exacerbations when BDR was defined as a change of FEV1 and/or FVC≥12%. | 1) reference category  2) **IRR: 1.27 (1.04-1.55)**  3) IRR: 1.02 (0.83-1.27)  4): **IRR: 1.26 (1.07-1.48)** | 1) reference category  2) **IRR: 1.33 (1.03-1.72)**  3) IRR: 1.07 (0.81-1.40)  4) **IRR: 1.33 (1.08-1.62)** |  |  |
| BDR (absolute or volumetric change),  (Lung function test result) | Association of bronchodilator response (BDR) categories at enrolment with drop in FEV1 between baseline and 5-year follow-up visit and respiratory exacerbations when BDR was defined as a change of FEV1 and/or FVC≥ 200ml. | 1) reference category  2) IRR: 1.32 (0.94-1.84)  3) IRR: 1.06 (0.92-1.22)  4) IRR: 1.10 (0.93-1.30) | 1) reference category  2) IRR: 1.42 (0.91-2.25)  3) IRR: 1.09 (0.90-1.31)  4): 1.16 (0.93-1.44) |  |  |
| PaO2,  (Biomarker) | Fujita, 2021 | mm Hg  Subjects were followed up for 1 year | **OR: 0.88 (0.79-0.99)** |  |  |  |
| Resting breathing instability,  (Lung function test result) | Estimated tidal volume (VT):  Breathing instability was assessed by using the coefficient of variation (coefficient of variation percentage = [SD/mean] ×100) for breath-by-breath total duration of respiratory cycle (T) and estimated tidal volume (V) with an arbitrary unit.  Subjects were followed up for 1 year | **OR: 1.13 (1.01-1.27)** |  |  |  |
| mMRC, (Symptoms) | Modified British Medical Research Council | **OR: 1.05 (0.34-3.13)** |  |  |  |
| red blood cell distribution width (RDW),  (Biomarker) | Garcia-Pachon, 2021 | in %   - Percentage of readmissions in the first three months after discharge - Low: Below or equal to median value. High: Above the median value |  | Median value 15.5; Low: 18%, high 31%  (p-value 0.103) |  |  |
| mean platelet volume (MPV) ,  (Biomarker) | Femtoliters (fL)   - Percentage of readmissions in the first three months after discharge - Low: Below or equal to median value. High: Above the median value |  | **Median value 9; low 37%, high 10%**  **(p-value 0.001)** |  | AUROC 0.64 |
| platelet (PLT) count,  (Biomarker) | x10^9/L   - Percentage of readmissions in the first three months after discharge - Low: Below or equal to median value. High: Above the median value |  | Median value 226; low 25% high 23%  (p-value 0.95) |  |  |
| neutrophil to lymphocyte ratio,  (Biomarker) | Percentage of readmissions in the first three months after discharge  Low: Below or equal to median value. High: Above the median value |  | Median value 8.56; low 28% high 21%  (p-value 0.87) |  |  |
| the platelet count to lymphocyte ratio,  (Biomarker) | Percentage of readmissions in the first three months after discharge  Low: Below or equal to median value. High: Above the median value |  | Median value 0.21; low 26% high 22%  (p-value 0.97) |  |  |
| the mean platelet volume to platelet ratio,  (Biomarker) | Percentage of readmissions in the first three months after discharge  Low: Below or equal to median value. High: Above the median value |  | Median value 38.4; low 24% high 25%  (p-value 0.99) |  |  |
| the number of eosinophils,  (Biomarker) | cells/µL   - Percentage of readmissions in the first three months after discharge - Low: Below or equal to median value. High: Above the median value |  | Median value 120; low 25% high 23%  (p-value 0.95) |  |  |
| Daily physical activity (VMUs),  (Patient characteristic) | Garcia-Rio, 2012 | Physical activity was measured over 5 consecutive days using an RT3 triaxial accelerometer (Stayhealthy). Analog-to-digital converted data were recorded every second with accelerometer, then added to produce 1-min movement epochs of vector magnitude units (VMUs).   - For every 10 VMUs increase in daily physical activity |  | **HR: 0.989 (0.983-0.995)** |  |  |
| Daily physical activity (VMUs) ,  (Patient characteristic) | Level of Daily Physical Activity and the Number of Hospitalizations Due to COPD Exacerbation   - Q1: <130 VMU - Q2: 130-200 VMU - Q3: 200-270 VMU - Q4 > 270 VMU |  | Q1: reference; Q2: N.S.A.  Q3**: IRR: 0.53 (0.29-0.96)**;  Q4: **IRR: 0.1 (0.03-0.29)** |  |  |
| Postbronchodilator FEV1 % predicted,  (Lung function test result) | Risk Factors for hospitalization due to COPD Exacerbation   - the patients with higher FEV1 |  | HR: 1.00 (0.96-1.04) |  |  |
| BODE index,  (Lung function test result) | BODE index = BMI, obstruction, dyspnea and exercise capacity  Risk Factors for Hospitalization Due to COPD Exacerbation |  | HR (95% CI): 0.97 (0.68-1.37) |  |  |
| SGRQ,  (Symptom) | St. George’s respiratory questionnaire (SGRQ)  Risk Factors for Hospitalization Due to COPD Exacerbation |  | HR: 0.67 (0.98-1.02) |  |  |
| PaO2,  (Biomarker) | Arterial blood gas values breathing room air were measured  Risk Factors for Hospitalization Due to COPD Exacerbation |  | HR: 1.00 (0.93-1.08) |  |  |
| PaCO2,  (Biomarker) | Arterial blood gas values breathing room air were measured  Risk Factors for Hospitalization Due to COPD Exacerbation |  | HR: 1.01 (0.92-1.12) |  |  |
| 6MWD,  (Lung function test result) | Two 6-Minute Walking Test according to ATS guidelines performed.  Risk Factors for Hospitalization Due to COPD Exacerbation   - The patient with higher 6MWD   6-minute walking distance (6MWD) In meters |  | HR: 1.00 (0.998-1.008) |  |  |
| VO2 peak,  (Lung function test result) | Oxygen uptake (VO2) peak cycle-ergometer   - The patient with higher peak VO2   In mL/min/kg |  | HR: 0.95 (0.86-1.04) |  |  |
| Endurance time,  (Lung function test result) | A symptom-limited incremental exercise test was conducted on a cycle-ergometer according to the American Thoracic Society/American College of Chest Physician standards.  Endurance time was defined as the duration of loaded pedaling.   - The patient with higher endurance time   In seconds |  | HR: 0.998 (0.995-1.001) |  |  |
| Chitotriosidase,  (Biomarker) | Harlander, 2020 | Enzymatic activity measured in plasma from venous blood   - Cut-off value: Per increase of 10 nmol/h/mL   (Whole population) |  |  | HR: 1.014 (0.997-1.032) |  |
| Chitotriosidase,  (Biomarker) | Enzymatic activity measured in plasma from venous blood.   - Cut-off value: Per increase of 10 nmol/h/mL   (Subpopulation: ≥1 exacerbation in previous year) |  |  | **HR: 1.028 (1.002-1.055)** |  |
| Age,  (Patient characteristic) | Age per year |  |  | HR: 0.97 (0.93-1.02) |  |
| Age,  (Patient characteristic) | Age per year  (Subpopulation: ≥1 exacerbation in previous year) |  |  | HR: 0.95 (0.86-1.16) |  |
| Sex,  (Patient characteristic) | Female sex |  |  | HR: 2.19 (0.94-5.08) |  |
| Sex  (Patient characteristic) | Female sex  (Subpopulation: ≥1 exacerbation in previous year) |  |  | HR: 1.40 (0.43-4.40) |  |
| BMI,  (Patient characteristic) |  |  |  | HR: 1.00 (0.91-1.12) |  |
| BMI,  (Patient characteristic) | (Subpopulation: ≥1 exacerbation in previous year), |  |  | HR: 1.01 (0.88-1.16) |  |
| Smoking status,  (Patient characteristic) | Current smokers |  |  | HR: 1.72 (0.75-3.40) |  |
| Smoking status  (Patient characteristic) | Current smokers  (Subpopulation: ≥1 exacerbation in previous year) |  |  | HR: 1.12 (0.36-3.47) |  |
| CAT,  (Composite: patient characteristic, symptom) | COPD assessment test (CAT) |  |  | HR: 1.01 (0.95-1.07) |  |
| CAT,  (Composite: patient characteristic, symptom) | (Subpopulation: ≥1 exacerbation in previous year) |  |  | HR: 1.04 (0.95-1.14) |  |
| FEV1,  (Lung function test result) | Per percentage (higher) |  |  | **HR: 0.976 (0.956-0.996)** |  |
| FEV1,  (Lung function test result) | Per percentage (higher)  (Subpopulation: ≥1 exacerbation in previous year) |  |  | HR: 0.99 (0.96-1.03) |  |
| Eosinophils,  (Biomarker) | Per percentage (higher) |  |  | **HR: 1.22 (1.05-1.42)** |  |
| Eosinophils,  (Biomarker) | Per percentage (higher)  (Subpopulation: ≥1 exacerbation in previous year) |  |  | HR: 0.97 (0.73-1.3) |  |
| History of ≥ 1 exacerbation,  (Patient characteristic) |  |  |  | HR: 1.60 (0.76-3.37) |  |
| Creatinin/ cystatin C,  (biomarker) | Hirai, 2021 | Low serum reatinine/cystatin C ratio   - Cut-off value: 0.71 |  | **B-Coef: 0.26 (0.10-0.42)** | B-Coef: 0.10  (-0.05-0.25) | AUROC 0.87 (0.81-0.91) |
| CAT,  (Compostie; symptom, patient characteristic) | Higher COPD Assessment Test (CAT) score |  | **B-Coef: 0.16 (0.01-0.32)** | **B-Coef: 0.20 (0.05-0.35)** |  |
| Age,  (Patient characteristic) | years |  | B-Coef: 0.08  (-0.08-0.24) | B-Coef: 0.10  (-0.05-0.25) |  |
| FEV1 % predicted,  (Lung function test result) | Percent predicted forced expiratory volume in the first second |  | B-Coef: -0.05  (-0.21-0.10) | **B-Coef: -0.28**  **(-0.43 - -0.13)** |  |
| GOLD 2017 ABCD, (composite; patient characteristic, symptom, lung function test result) | Lee, 2019 | COPD GOLD classification into A, B, C or D via CAT and mMRC   1. GOLD A, reference; 2. Gold B 3. GOLD C 4. GOLD D |  | 2) OR: 1.93 (0.67-5.60);  3) **OR: 7.55 (1.25-45.8);**  4) **OR: 25.0 (6.01-102.9)** |  | AUROC 0.74 |
| GOLD 2011 ABCD, (composite; patient characteristic, symptom, lung function test result) | COPD GOLD classification into A, B, C or D via CAT, mMRC and history of exacerbations   1. GOLD A, reference; 2. Gold B 3. GOLD C 4. GOLD D |  | 2) OR: 1.40 (0.40-4.85);  3) OR: 3.67 (0.79-17.1);  4) **OR: 6.75 (2.07-22.0)** |  | AUROC 0.71 |
| GOLD 2007 I-IV,  (Composite; patient characteristic, lung function test result) | COPD GOLD classification into I, II, III or IV by spirometry only   1. GOLD A, reference; 2. Gold B 3. GOLD C 4. GOLD D |  | 2) OR: 2.83 (0.31-26.1);  3) OR: 8.24 (0.87-78.2);  4) **OR: 31.5 (2.52-394.4)** |  | AUROC 0.70 |
| BODE index,  (Composite; patient characteristic, symptom, lung function test result) | BODE: BMI, obstruction, dyspnea and exercise capacity |  |  |  | AUROC 0.75 |
| Age,  (Patient characteristic) | Medina – Mirapeix, 2021 | Predictor In years  Predicting exacerbations in the following year |  | **OR: 1.10 (1.02-1.19)** |  |  |
| Sex,  (Patient characteristic) | Male gender  Predicting exacerbations in the following year |  | OR: 0.27 (0.03-2.35) |  |  |
| Smoking status  (Patient characteristic) | Yes/ no  Predicting exacerbations in the following year |  | OR: 0.87 (0.29-2.58) |  |  |
| BMI,  (Patient characteristic) | Predicting exacerbations in the following year |  | OR: 1.00 (0.91-1.10) |  |  |
| Comorbidity index,  (Patient characteristic) | Measured with functional comorbidity index  Predicting exacerbations in the following year |  | OR: 0.84 (0.63-1.13) |  |  |
| Number of moderate or severe exacerbations in previous year,  (Patient characteristic) | Predicting exacerbations in the following year |  | **OR: 1.61 (1.17-2.21)** |  |  |
| Dyspnea (mMRC),  (symptom) | Measured with the modified Medical Research Council (mMRC)  Predicting exacerbations in the following year |  | OR: 1.59 (0.97-2.63) |  |  |
| CAT,  (Composite; patient characteristic, symptom) | COPD assessment test (CAT)  Predicting exacerbations in the following year |  | OR: 1.06 (1.00-1.14) |  |  |
| Bronchial mucus hypersecretion,  (symptom) | Predicting exacerbations in the following year |  | OR: 1.61 (0.62-4.13) |  |  |
| Daily cough,  (symptom) | Predicting exacerbations in the following year |  | OR: 1.25 (0.49-3.19) |  |  |
| SpO2,  (lung function test results) | Resting oxygen saturation (SpO2), measured with a pulse oximeter.  Predicting exacerbations in the following year |  | OR: 0.81 (0.69-1.00) |  |  |
| FEV1  (Lung function test results) | Post-bronchodilator spirometry  FEV1 in Liters.  Predicting exacerbations in the following year |  | OR: 0.41 (0.12-1.36) |  |  |
| GOLD ABCD,  (Composite; patient characteristic, lung function test result) | Classification in ABCD according to 2019 guidelines   - 1. GOLD A: reference;   2. GOLD B:   3. GOLD C:   4. GOLD D:   Predicting exacerbations in the following year |  | 2) OR: 2.01 (0.17-24.22);  3) OR: 0.98 (0.05-20.06);  4) OR: 4.30 (0.47-38.90) |  |  |
| 6MWT,  (Lung function test results) | six-minute-walk test (6MWT)  The results were categorized into two groups (<350m or ≥350m); <350m was considered poor physical performance.   - Poor 6MWT(<350m):   Predicting exacerbations in the following year: |  | **OR: 3.20 (1.14-8.96)** |  | AUROC 0.78  (0.69-0.88) |
| 5STS,  (Lung function test result) | five-repetition sit-to-stand (5STS): the time (seconds) taken to stand five times from a sitting position, as rapidly as possible.  Score 0–4: a higher score indicated greater functional status.   - The cut-off score was ≤2   Lower 5STS:  Predicting exacerbations in the following year: |  | **OR: 3.84 (1.14-12.94)** |  | AUROC 0.79 (0.70-0.88) |
| 4MGS,  (Lung function test result) | 4-meter gait speed (4MGS); measured the time (seconds) taken to cross a 4-m line at a typical walking speed.  Score 0–4: a higher score indicated greater functional status.  Patients were classified into two groups   - The cut-off score was ≤3   Lower 4MGS:  Predicting exacerbations in the following year |  | OR: 1.96 (0.71-5.45) |  |  |
| mMRC,  (Symptom) | Natori, 2016 | The modified Medical Research Council (mMRC) scale was assessed only once based on a sel freport completed by each patient before observation.   1. Grade 0: reference; 2. Grade 1; 3. Grade 2; 4. Grade 3; 5. Grade 4; 6. Grade 1-2; 7. Grade 3-4   Annual moderate or severe exacerbation | B) RR: 2.13 (0.74-6.30);  C) RR: 2.36 (0.60-9.87);  D) RR: 6.56 (0.76-146);  E) RR: 5.21 (0.57-118);  F) RR: 2.19 (0.80-6.11);  G) RR: 5.74 (0.98-48.2) | B) RR: 0.37 (0.02-4.23);  C) RR: 3.03 (0.43-27.5);  D) RR: 14.6 (1.50-202);  E) RR: 10.8 (0.93-158);  F) RR: 1.13 (0.20-8.92);  G) RR: 8.88 (1.19-93.9) |  |  |
| GOLD I-IV,  (Lung function test result) | Spirometry was performed in accordance with the American Thoracic Society (ATS)/European Respiratory Society (ERS) task forces, classification I, II, III, IV   1. GOLD I: reference; 2. GOLD II: 3. GOLD III 4. GOLD IV   Annual moderate or severe exacerbation | B): **RR: 8.06 (1.97-55.0);**  C) **RR: 11.7 (2.15-95.2);**  D) **RR: 23.3 (1.83-700)** | B) RR: 3.55x10^6 (0.40-infinity);  C) RR: 2.14x10^6 (0.17-infinity);  D) RR: 2.32x10^6 (0.13-infinity) |  |  |
| CID (TORCH),  (Composite; patient characteristic, symptom, lung function test result) | Naya, 2018 | Based on patients from the TORCH study. Composite Clinically Important Deterioration (CID) was defined as any one of the following component events:   - decrease of ≥100 mL from baseline in post-bronchodilator FEV1; - increase of ≥4 units in SGRQ score from baseline; - incidence of a moderate/severe exacerbation.   Patients were categorized into two subgroups:   1. those who met ≥1 CID criteria within the first 6 months after enrollment (CID+); 2. those who did not (CID-)  - CID + versus CID-:   At 36 months CID+ HR: | **HR: 1.61 (1.50-1.72)** | **HR: 1.55 (1.38-1.73)** |  |  |
| CID (ECLIPSE),  (Composite; patient characteristic, symptom, lung function test result) | Based on patients from the ECLIPSE study. Composite Clinically Important Deterioration (CID) was defined as any one of the following component events:   - decrease of ≥100 mL from baseline in post-bronchodilator FEV1; - increase of ≥4 units in SGRQ score from baseline; - incidence of a moderate/severe exacerbation.   Patients were categorized into two subgroups:   1. those who met ≥1 CID criteria within the first 12 months after enrollment (CID+); 2. those who did not (CID-)  - CID + versus CID-:   At 36 months CID+ HR: | **HR: 2.54 (2.20-2.93)** | **HR: 2.81 (2.17-3.63)** |  |  |
| Age,  (Patient characteristic) | Numata, 2021 | Greater age:  Annual exacerbations |  | **OR: 1.11 (1.02-1.21)** | **OR: 1.11 (1.02-1.21)** |  |
| BMI,  (Patient characteristic) | Lower BMI  Annual exacerbations |  | OR: 0.84 (0.7-1.01) | **OR: 0.87 (0.77-0.97)** |  |
| COPD stage 3/4, (Composite; patient characteristic, lung function test result) | Annual exacerbations |  | OR: 1.2 (0.34-3.9) | **OR: 2.8 (1.1-7)** |  |
| History of exacerbation  (Patient characteristic) | Yes  Annual exacerbations |  | **OR: 8.8 (2.2-34.4)** |  |  |
| History of ICS treatment,  (Patient characteristic) | Yes  ICS = inhaled corticosteroid, 46 patients had history of ICS treatment  Annual exacerbations |  | OR: 2.3 (0.72-7.1) | OR: 1.7 (0.71-3.9) |  |
| Age,  (Patient characteristic) | Nuñez, 2020 | Years |  |  | N.S.A.: NR |  |
| Sex,  (Patient characteristic) |  |  |  | N.S.A.: NR |  |
| Pack-years,  (Patient characteristic) |  |  |  | N.S.A.: NR |  |
| mMRC,  (Symptom) | modified Medical Research Council (mMRC) |  |  | N.S.A.: NR |  |
| CAT,  (Symptom) | COPD Assessment Test (CAT)   - cut-off value: ≥15   higher CAT score HR: |  |  | **HR : 1.03 (1.01-1.05)** | AUROC 0.68 (0.62-0.74) |
| FEV1%,  (Lung function test result) | - cut-off value: < 55%   Lower FEV1(%) HR: |  |  | **HR: 0.99 (0.98-0.99)** | AUROC 0.65 (0.59-0.71) |
| Sputum production,  (Symptom) |  |  |  | N.S.A.: NR |  |
| Exacerbation in previous year,  (Patient characteristic) | Number of moderate and severe AECOPD in year prior to inclusion |  |  | **HR: 1.94 (1.32-2.84)** |  |
| CRP,  (Biomarker) | C-reactive protein, blood analysis in stable state |  |  | N.S.A.: NR |  |
| Leukocytes,  (Biomarker) |  |  |  | N.S.A.: NR |  |
| Hemoglobin,  (Biomarker) |  |  |  | N.S.A.: NR |  |
| Platelets,  (Biomarker) |  |  |  | N.S.A.: NR |  |
| Fibrinogen,  (Biomarker) |  |  |  | N.S.A.: NR |  |
| Alpha-1 antitrypsin,  (Biomarker) |  |  |  | N.S.A.: NR |  |
| Neutrophil-lymphocyte ratio,  (Biomarker) |  |  |  | N.S.A.: NR |  |
| Eosinophil-lymphocyte ratio,  (Biomarker) |  |  |  | N.S.A.: NR |  |
| Eosinophil-basophil ratio,  (Biomarker) |  |  |  | N.S.A.: NR |  |
| Platelet-lymphocyte ratio,  (Biomarker) |  |  |  | N.S.A.: NR |  |
| Statistical model,  (Composite; patient characteristic, symptom, lung function test result) | CAT score, FEV1% predicted and exacerbations in previous year; Exp(β)/(1 + Exp(β)), where β = - 1.597 + 0.696 [in case of a CAT score ≥ 15) + 1.074 [in case of FEV1 < 55%) + 0.963 [in case of previous exacerbations] |  |  | NR | AUROC 0.73 (0.68 – 0.79) |
| Age,  (Patient characteristic) | Sakurai, 2018 |  |  |  | OR: 1.04 (1.00-1.08) |  |
| Pack-years,  (Patient characteristic) |  |  |  | OR: 1.00 (1.00-1.00) |  |
| FEV1% Predicted,  (Lung function test result) | FEV1% predicted <50% |  |  | **OR 2.69 (1.37-5.33)** | AUROC 0.64  (0.57-0.72) |
| NLR,  (Biomarker) | Neutrophil-to-lymphocyte ratio (NLR :the absolute neutrophil count divided by the absolute lymphocyte count.  blood samples were collected at baseline and annually for 3 years, at a time when the disease was stable   - cut off: ≥ 2.7   risk factor for exacerbation over 3 years |  |  | **OR: 2.22 (1.10-4.46)** | 0.63  (0.55-0.72) |
| Neutrophil count,  (Biomarker) | Blood samples were collected at baseline and annually for 3 years, at a time when the disease was stable |  |  |  | AUROC 0.55  (0.46-0.62) |
| Lymphocyte count,  (Biomarker) | Blood samples were collected at baseline and annually for 3 years, at a time when the disease was stable |  |  |  | **AUROC 0.60 (0.51-0.68)** |
| Eosinophil count,  (Biomarker) | Blood samples were collected at baseline and annually for 3 years, at a time when the disease was stable |  |  |  | AUROC 0.51  (0.42-0.61) |
| AreaFE%,  (Lung function test result) | Satici, 2021 | *The ratio of area under observed FVL to reference flow volume loop (FVL) was reported as AreaFE%*   - cut-off value: < 0.17 |  | **OR: 0.84 (0.73-0.97)** |  | AUROC 0.88  (0.78-0.98)  [SN 0.82, SP 0.83, PPV 0.42, NPV 0.96] |
| CAT Score,  (Composite; symptom, lung function test result) | COPD Assessment Test (CAT) score  High grade of dyspnea is defined as having a CAT score of ≥10   - cut-off value: ≥ 20.5 |  | **OR: 1.12 (1.07-1.72)** |  | AUROC 0.80 (0.64-0.95)  [SN 0.72, SP 0.85, PPV 0.42, NPV 0.95] |
| Age, (Patient characteristic) | Years |  | OR: 1.24 (0.97-1.59) |  |  |
| FEV1 (%), (Lung function test result) | Forced expiratory volume in first second |  | OR: 0.99 (0.90-1.14) |  |  |
| 6MWT, (Lung function test result) | Six-minute walking test (6MWT) in meters |  | OR: 0.99 (0.99-1.01 |  |  |
| Fibrinogen,  (Biomarker) | Singh, 2021 | Annual rate of COPD exacerbations were analyzed post hoc in the fibrinogen population according to a fibrinogen threshold: ≥ or<3.5 g/L and by fibrinogen quartiles   - exacerbation risk with fibrinogen ≥3.5 g/L:   over a 36 weeks time period | RR: 1.03 (0.95-1.11) | **RR: 1.30 (1.10-1.54)** | **RR: 1.08 (1.00-1.15)** |  |
| Age,  (Patient characteristic) | Soltani, 2015 | Years  The risk of 3- and 6-month cumulative re-attendance rate: |  | **RR: 0.97 (0.94-0.99)** |  |  |
| Gender,  (Patient characteristic) | Male vs female   - reference; male   The risk of 3- and 6-month cumulative re-attendance rate |  | RR: 0.79 (0.45-1.41) |  |  |
| BMI,  (Patient characteristic) | The risk of 3- and 6-month cumulative re-attendance rate |  | RR: 1.01 (0.98-1.04) |  |  |
| Smoking status,  (Patient characteristic) | Ex- vs current smoker   - reference; ex-smokers   The risk of 3- and 6-month cumulative re-attendance rate |  | RR: 1.43 (0.78-2.63) |  |  |
| Social support,  (Patient characteristic) | 3 groups: A) living with partner; B) living alone; C) nursing home   - A) living with partner is reference   The risk of 3- and 6-month cumulative re-attendance rate |  | B) RR: 1.16 (0.65-2.05);  C) NR |  |  |
| Cough,  (Symptom) | Presence of cough: yes/no  The risk of 3- and 6-month cumulative re-attendance rate |  | RR: 1.70 (0.26-11.0) |  |  |
| Sputum production,  (Symptom) | Presence of sputum production: yes/no  The risk of 3- and 6-month cumulative re-attendance rate |  | RR: 1.68 (0.55-5.11) |  |  |
| Systolic blood pressure,  (Patient characteristic) | mmHg  The risk of 3- and 6-month cumulative re-attendance rate |  | RR: 1.00 (0.99-1.01) |  |  |
| Pulse rate,  (Patient characteristic) | Per min  The risk of 3- and 6-month cumulative re-attendance rate |  | RR: 1.00 (0.99-1.01) |  |  |
| Respiratory rate,  (Patient characteristic) | Per min  The risk of 3- and 6-month cumulative re-attendance rate |  | RR: 0.97 (0.91-1.02) |  |  |
| Temperature,  (Patient characteristic) | °C  The risk of 3- and 6-month cumulative re-attendance rate |  | RR: 0.90 (0.62-1.31) |  |  |
| Arterial pH,  (Biomarker) | The risk of 3- and 6-month cumulative re-attendance rate |  | **RR: 0.98 (0.96-1.00)** |  |  |
| PaCO2,  (Biomarker) | mmHg  The risk of 3- and 6-month cumulative re-attendance rate |  | **RR: 1.01 (1.00-1.01)** |  |  |
| SpO2,  (Lung function test result) | %  The risk of 3- and 6-month cumulative re-attendance rate |  | RR: 1.01 (0.98-1.04) |  |  |
| FEV1% predicted,  (Lung function test result) | The risk of 3- and 6-month cumulative re-attendance rate |  | **RR: 0.97 (0.95-1.00)** |  |  |
| FVC1 predicted,  (Lung function test result) | The risk of 3- and 6-month cumulative re-attendance rate |  | **RR: 0.98 (0.97-1.00)** |  |  |
| FEV1/FVC,  (Lung function test result) | The risk of 3- and 6-month cumulative re-attendance rate |  | RR: 0.98 (0.95-1.01) |  |  |
| DCLO% predicted,  (Lung function test result) | lung diffusion of carbon monoxide  The risk of 3- and 6-month cumulative re-attendance rate |  | RR: 0.98 (0.95-1.02) |  |  |
| Blood sugar,  (Biomarker) | µmol/L  The risk of 3- and 6-month cumulative re-attendance rate |  | RR: 1.01 (0.90-1.12) |  |  |
| CRP,  (Biomarker) | C-reactive proteim (CRP)  mg/L  The risk of 3- and 6-month cumulative re-attendance rate |  | RR: 0.995 (0.99-1.00) |  |  |
| WBC,  (Biomarker) | White blood cell count (WBC)  x10^9/L  The risk of 3- and 6-month cumulative re-attendance rate |  | RR: 0.998 (0.94-1.06) |  |  |
| Age,  (Patient characteristic) | Suetomo, 2014 | ≥65 years  Annual exacerbation |  |  | OR: 1.6 (0.6-4.0) |  |
| CAT,  (Composite; patient characteristic, symptom) | Total COPD Assessment Test (CAT) score ≥10 points  Annual exacerbation |  | **OR: 3.8 (1.1-17.7)** | **OR: 4.5 (1.9-11.3)** | Moderate AECOPD: AUROC 0.77; Severe AECOPD: AUROC 0.79 |
| GOLD I-IV,  (Lung function test result) | COPD GOLD III and IV  Annual exacerbation |  | **OR: 3.8 (1.2-12.6)** | **OR: 5.7 (2.3-15.3)** |  |
| SGRQ-C,  (Symptom) | Wilke, 2015 | The COPD specific version of the SGRQ (SGRQ-C) was used. Risk estimates are made for the AECOPD occurring in the two following years.  A change of four units in total score is considered as the minimum clinically important difference.   1. groups: 2. clinically significant 1-year deterioration in SGRQ score (Δ ≥ +4 points) 3. non-clinically significant 1-year change in SGRQ score (Δ −3.99 to +3.99 points), 4. clinically significant 1-year improvement in SGRQ score (Δ≤−4 points). |  | 1)Improvement vs no change: HR: 0.94 (0.76-1.17);  2) No change vs deterioration: **HR: 0.77 (0.62-0.97);**  3)Improvement vs Deterioration: **HR: 0.72 (0.58-0.90)** | 1)Improvement vs no change: HR: 0.93 (0.82-1.07);  2)No change vs deterioration: **HR: 0.84 (0.73-0.97);**  3)Improvement vs Deterioration: **HR: 0.78 (0.67-0.89)** |  |

Bold font indicates a statistically significant association (p<0.05)

Abbreviations: B-coef: b, standardized regression coefficient, HR: Hazard ratio, OR: Odds ratio, IRR: Incidence Rate Ratio, LL: Likelihood, Coef: coefficient, AUC: area under the ROC curve, SN: sensitivity, SP: specificity, PPV: positive predictive value, NPV: negative predictive value, N.S.A: No Significant Association, 95% CI: 95% Confidence Interval, ICS: Inhaled corticosteroids, LABA: long-acting beta-agonists, SABA: short-acting beta-agonists, FEV: Forced expiratory volume, BDR: Bronchodilator, FVC: forced vital capacity, ATS: American Thoracic Society, CAT: COPD Assessment Test, SGRQ: St. George’s Respiratory Questionnaire, mMRC: modified Medical Research council, 6MWT: 6-minute walking test, 6MWD: 6-minute walking distance, 6MWS: 6 minute walking speed, GOLD: Global Initiative for Obstructive Lung Disease
